# Supplementary material
Source: MDPI journal article supplement (https://www.mdpi.com/2076-3298/6/8/87)
Supplement: s1 [file s1]

**Supplementary materials** for the article “**Paving the way for a sustainable and efficient SiO<sub>2</sub>/TiO<sub>2</sub> photocatalytic composite**” by Mattia Pierpaoli, Xu Zheng, Vladimir Bondarenko, Gabriele Fava, Maria Letizia Ruello

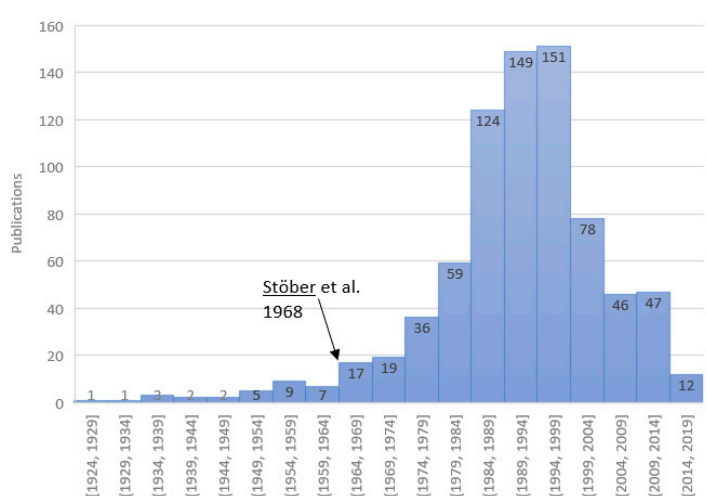

**Fig S1.** Time distribution of 768 selected publications about silica/titania composites.

All data were obtained from the Web of Science Core Collection (WoSCC) by Thomson Reuters prior to 1 June 2019. In this study, the keywords used for the data retrieval strategy were as follows: TI=((silica OR SiO<sub>2</sub>) AND (TiO<sub>2</sub> OR titania)). English-only document types were selected from the following indexes: SCI-EXPANDED, SSCI, A&HCI, CPCI-S, CPCI-SSH, and ESCI. The final dataset contained 5084 bibliographic records. A further selection were made by using Citespace, in which 768 publications were selected using the following criteria: 10% of the most cited publication, in each year slice were subjected to a pruning of the merged network, by using the pathfinder algorithm.

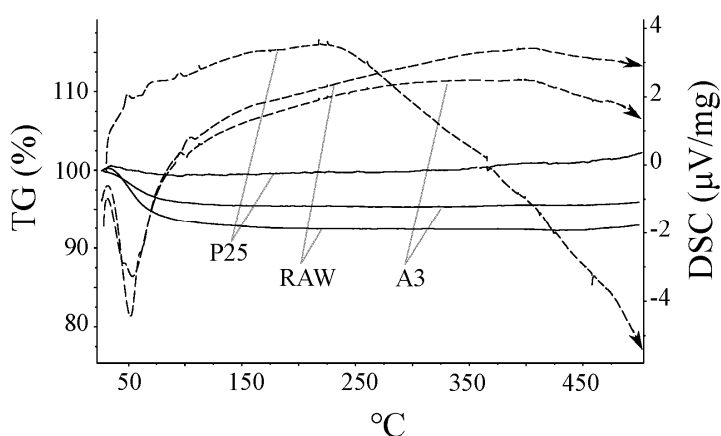

**Fig S2.** TGA analysis of the samples

The TGA (solid lines) reveals that the weight losses (-7.51%, -0.77%, -4.42%) occurs in the temperature range from 30 °C to 191 °C, 30°C to 95°C and 30°C to 127°C respectively for the RAW, T, A3 samples. The total weight losses are due to the elimination of a small amount of the physically adsorbed water [25]. The DSC thermogram (dotted lines) shows a small endothermic peak at 52.5°C and 54.0°C respectively for the RAW and A3 samples, which is resulted from desorption of physically adsorbed water, while no peak was observed for the P25 sample.

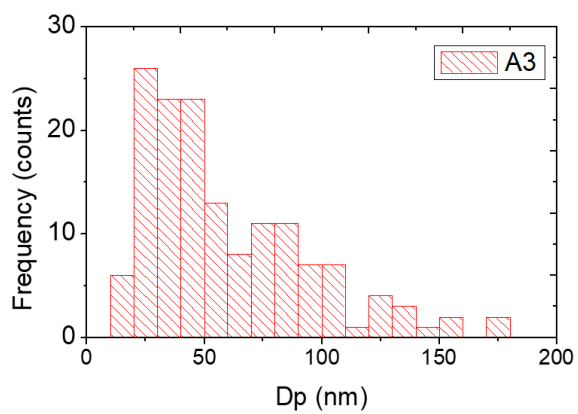

**Fig S3.** The primary particle size distributions measured from SEM images for the sample A3

| Sample | TiO <sub>2</sub> /SiO <sub>2</sub> | composite mass | MEK initial concentration | removal rate under UV conditions | removal rate under dark conditions | Net removal rate | α    | NOx initial concentration | NO removal             | NOx removal            |
|--------|------------------------------------|----------------|---------------------------|----------------------------------|------------------------------------|------------------|------|---------------------------|------------------------|------------------------|
|        | %                                  | g              | mg/l                      | mg/min                           | mg/min                             | mg/min           | -    | ppb                       | % (surface normalized) | % (surface normalized) |
| RAW    | 0                                  | 0.15           | 4                         | 0.22                             | 0.29                               | -0.11            | 0.86 | 458                       | 1.9                    | 0.6                    |
| A3     | 3                                  | 0.15           | 4                         | 1.11                             | 0.9                                | 0.35             | 0.72 | 456                       | 15.3                   | 7.1                    |
| A7     | 7                                  | 0.15           | 4                         | 0.43                             | 0.26                               | 0.28             | 0.88 | 443                       | 12.3                   | 4.9                    |
| A12    | 12                                 | 0.15           | 4                         | 0.23                             | 0.23                               | 0                | 0.78 | 433                       | 9.8                    | 2.9                    |
| W3     | 3                                  | 0.15           | 4                         | 0.87                             | 0.59                               | 0.48             | 0.72 | 455                       | 1.9                    | 0.6                    |
| W7     | 7                                  | 0.15           | 4                         | 0.46                             | 0.35                               | 0.19             | 0.72 | 403                       | 6.8                    | 1.7                    |
| W12    | 12                                 | 0.15           | 4                         | 0.31                             | 0.28                               | 0.05             | 0.82 | 438                       | 14.9                   | 5.1                    |

**Table S4:** Photocatalytic properties of the samples
